# Supplementary material for: Stability assessment of organic sulfur and organosulfate compounds in filter samples for quantification by Fourier- transform infrared spectroscopy
Source: Copernicus journal article supplement (doi:10.5194/amt-16-3515-2023), 2023-07-21
Supplement: Supplementary file 1 [file amt-16-3515-2023-supplement.pdf]

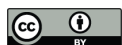

*Supplement of*

## **Stability assessment of organic sulfur and organosulfate compounds in filter samples for quantification by Fourier-transform infrared spectroscopy**

**Marife B. Anunciado et al.**

*Correspondence to:* Ann M. Dillner ([amdillner@ucdavis.edu](mailto:amdillner@ucdavis.edu))

The copyright of individual parts of the supplement might differ from the article licence.

- 1 Table S1. Reference wavenumbers and % transmissions from SBDS database <sup>1</sup> compared to
- 2 wavenumbers obtained from laboratory standards for organosulfur and organosulfate compounds
- 3 of interest. Percent transmissions increase with peak intensity.

| Organosulfur or organosulfate compound                                                                                                        | Wavenumber, reference                                                                                                                                                    | T % transmission | Wavenumber, laboratory standards |
|-----------------------------------------------------------------------------------------------------------------------------------------------|--------------------------------------------------------------------------------------------------------------------------------------------------------------------------|------------------|----------------------------------|
| Methanesulfonic acid (CH <sub>3</sub> SO <sub>3</sub> H)<br>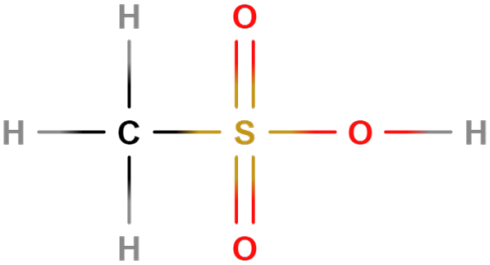 | 1415                                                                                                                                                                     | 62               | 1414                             |
|                                                                                                                                               | 1342                                                                                                                                                                     | 4                | 1338                             |
|                                                                                                                                               | 1173                                                                                                                                                                     | 4                | *                                |
|                                                                                                                                               | 1049                                                                                                                                                                     | 39               | 1061, 1050                       |
|                                                                                                                                               | 987                                                                                                                                                                      | 6                | 987                              |
|                                                                                                                                               | 895                                                                                                                                                                      | 7                | 900                              |
|                                                                                                                                               | 768                                                                                                                                                                      | 18               | 766                              |
|                                                                                                                                               | 536                                                                                                                                                                      | 6                | 535                              |
|                                                                                                                                               | 504                                                                                                                                                                      | 12               | *                                |
|                                                                                                                                               | Hydroxymethanesulfonate, sodium salt<br>(HOCH <sub>2</sub> SO <sub>3</sub> H (Na))<br> | 1432             | 60                               |
| 1343                                                                                                                                          |                                                                                                                                                                          | 64               | No peak                          |
| 1229, 1204, 1150                                                                                                                              |                                                                                                                                                                          |                  | PTFE                             |
| 1086                                                                                                                                          |                                                                                                                                                                          | 31               | 1092                             |
| 1042                                                                                                                                          |                                                                                                                                                                          | 10               | 1041                             |
| 1033                                                                                                                                          |                                                                                                                                                                          | 10               | No peak/shoulder of 1042         |
| 933                                                                                                                                           |                                                                                                                                                                          | 79               | 934                              |
| 761                                                                                                                                           |                                                                                                                                                                          |                  | *                                |
| 732                                                                                                                                           |                                                                                                                                                                          |                  | *                                |
| 707                                                                                                                                           |                                                                                                                                                                          |                  | *                                |
| 605                                                                                                                                           |                                                                                                                                                                          |                  | *                                |
| 538                                                                                                                                           |                                                                                                                                                                          |                  | *                                |
| 522                                                                                                                                           |                                                                                                                                                                          |                  | *                                |
| Methyl sulfate, sodium salt<br>(CH <sub>3</sub> SO <sub>4</sub> H (Na))                                                                       |                                                                                                                                                                          | 1458             | 16                               |
|                                                                                                                                               | 1376                                                                                                                                                                     | 26               | *                                |

<sup>1</sup> Reference spectra of each compound was taken from [https://sdfs.db.aist.go.jp/sdfs/cgi-bin/direct\\_frame\\_top.cgi](https://sdfs.db.aist.go.jp/sdfs/cgi-bin/direct_frame_top.cgi).

|                                                                                   |      |    |                 |
|-----------------------------------------------------------------------------------|------|----|-----------------|
| 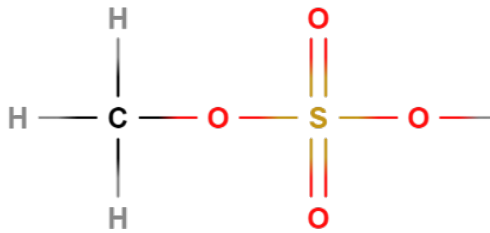 | 1366 | 30 | *               |
|                                                                                   | 1209 | 12 | *               |
|                                                                                   | 1177 | 16 | *               |
|                                                                                   | 1154 | 25 | *               |
|                                                                                   |      |    | 1135 (new peak) |
|                                                                                   | 1115 | 44 | 1115            |
|                                                                                   | 1076 | 31 | 1073            |
|                                                                                   | 999  | 16 | 1020, 1000      |
|                                                                                   | 795  | 33 | 795             |
|                                                                                   | 783  | 25 | 784             |
|                                                                                   | 722  | 74 | *               |
|                                                                                   | 615  | 30 | *               |
|                                                                                   | 596  | 18 | 591             |
|                                                                                   | 568  | 32 | *               |

4

5 Note: \* denotes a peak that is excluded from spectral characterization due to PTFE interference.

6

7

8

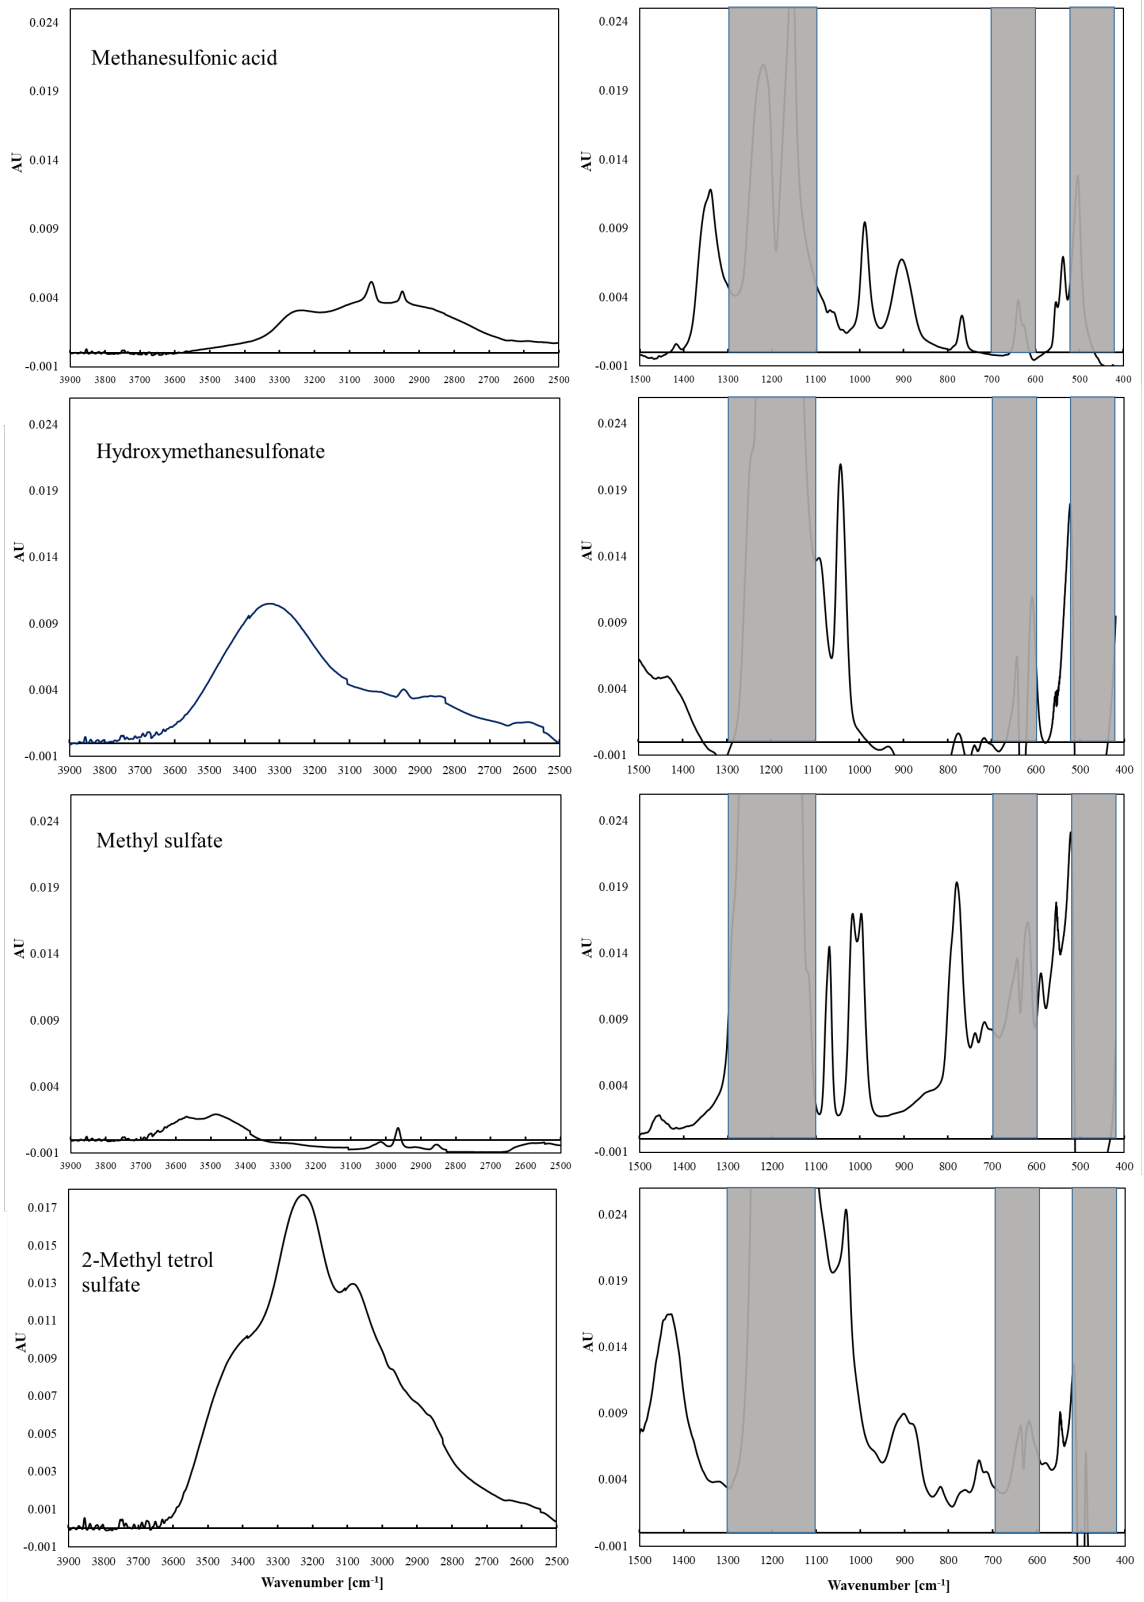

9

10

Figure S1. Baseline corrected spectra of selected compounds on PTFE filters.

11

Table S2. Vendor information for primary and secondary sources

| Name of Solution or Salt      | Primary Source                                                       | Secondary Source                                                    |
|-------------------------------|----------------------------------------------------------------------|---------------------------------------------------------------------|
| 1000 $\mu\text{g/mL}$ Sulfate | SPEX CertiPrep (Metuchen, NJ)                                        | NSI Lab Solutions (Raleigh, NC)                                     |
| MSA                           | Sigma Aldrich, $\geq 99\%$ purity (St Louis, MO)                     | Acros Organics 99% purity (Fisher Scientific, Waltham, MA)          |
| HMS                           | Alfa Aesar, sodium salt, 95% purity (Ward Hill, MA)                  | TCI, sodium salt, $>97.0\%$ purity (Fisher Scientific, Waltham, MA) |
| MS                            | TCI, sodium salt, $> 98.0\%$ purity (Fisher Scientific, Waltham, MA) | MP Biomedicals, potassium salt, 99.7% purity (Santa Ana, CA)        |

12

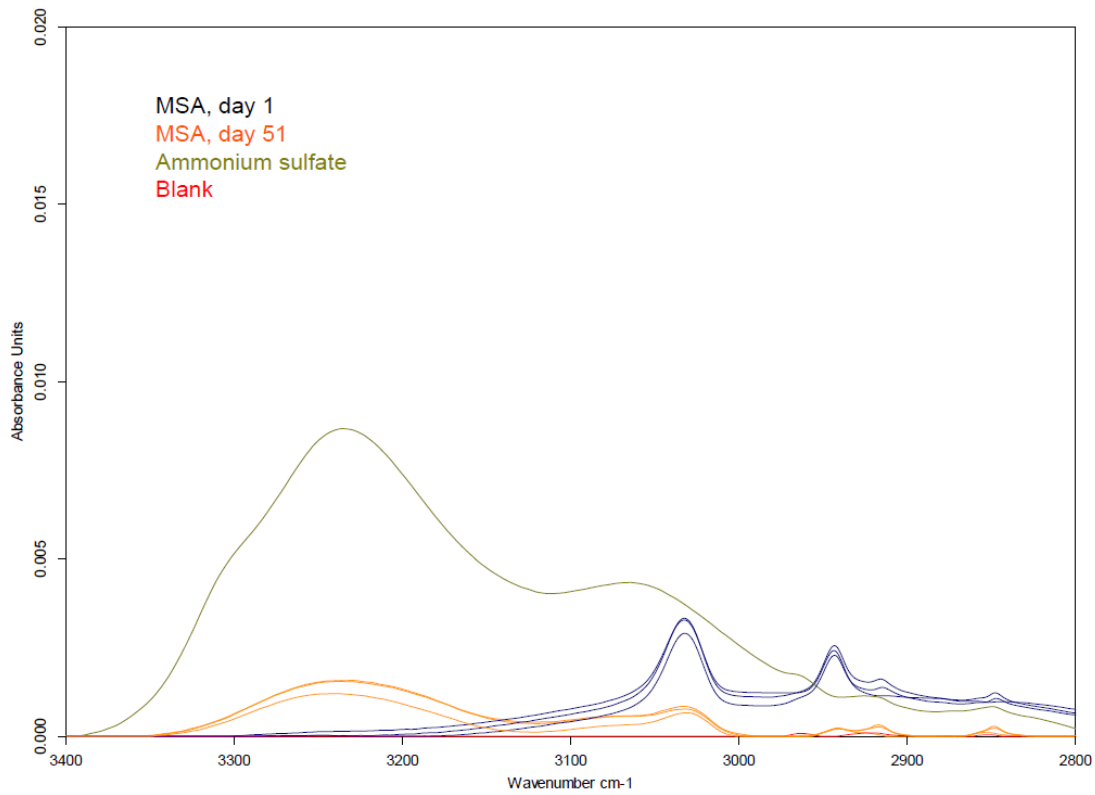

13

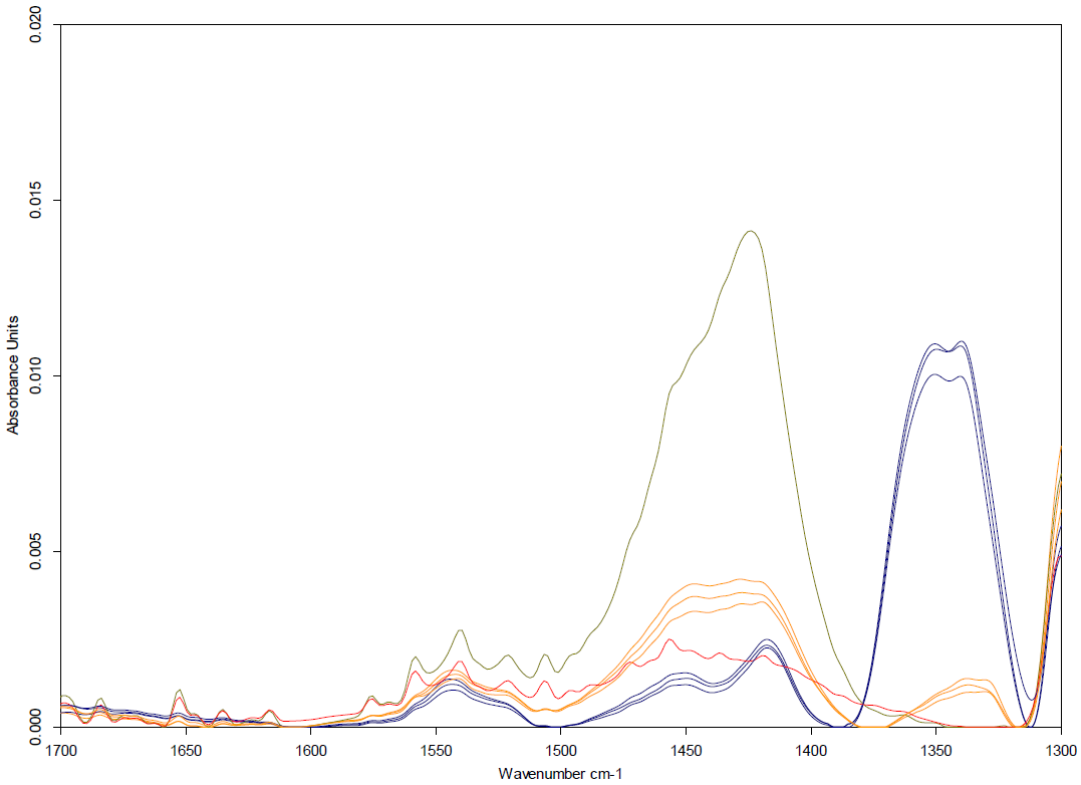

14

15 Figure S2. FT-IR spectra (split into two regions of four methanesulfonic acid (MSA)  
 16 filters on day 1 in blue and day 51 in orange relative to ammonium sulfate (olive green)  
 17 and blank (red).

18

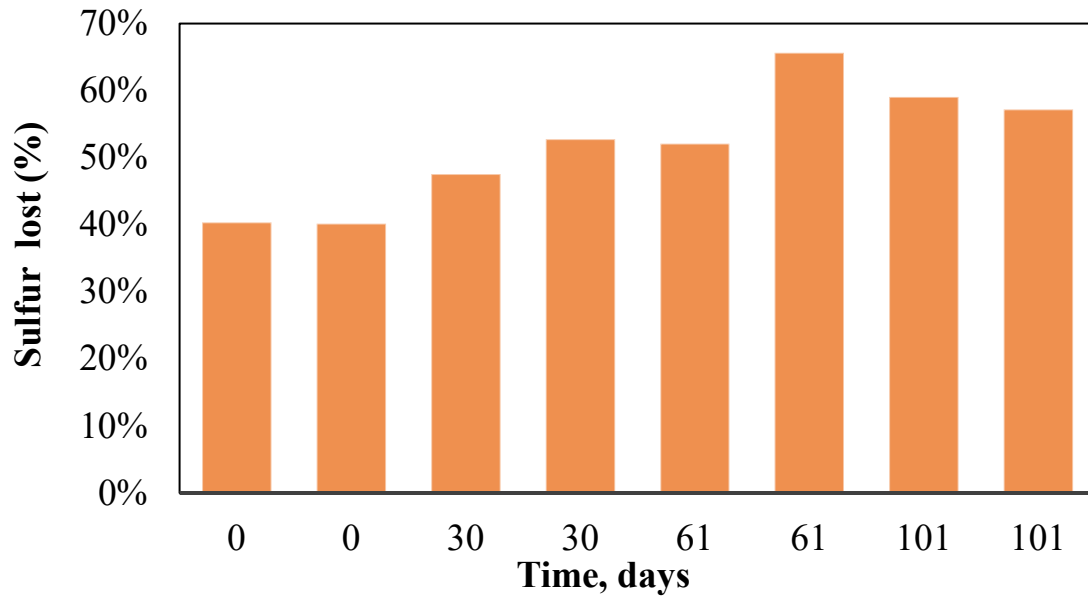

19

20 Figure S3. Percentage recovery of sulfur lost from PTFE filters over time as measured by  
21 IC. At each time point, 2 filters were extracted and analyzed.  
22

23

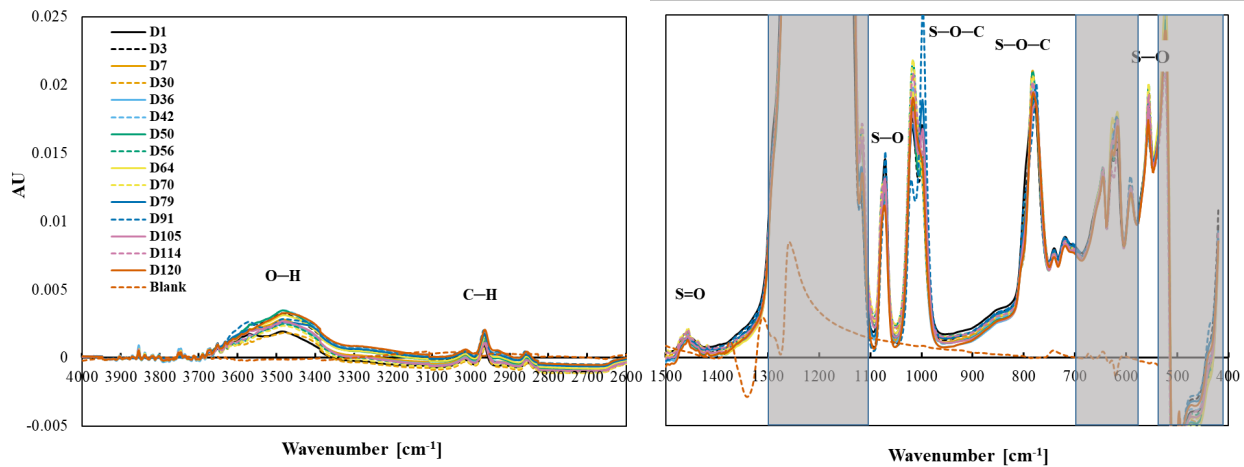

24

25 Figure S4. Same as Figure 7 except it include anomalous spectra collected on day 91.  
26

27

28 Eight PTFE filters were extracted on day 0 and recoveries of MTS averaged  $78 \pm 22\%$  for ICP-

29 OES. Recoveries of QC samples were  $97 \pm 6\%$ , suggesting inconsistent and incomplete

30 extraction. However, the extracts with the filters remaining in the extraction liquid were  
31 analyzed over time and the extraction efficiency increases over time and averages  $100 \pm 24\%$  on  
32 day 68 (Figure S5). This suggest that improved extraction procedures could increase extraction  
33 efficiency. Further work may be need to improve the consistency of the extraction.

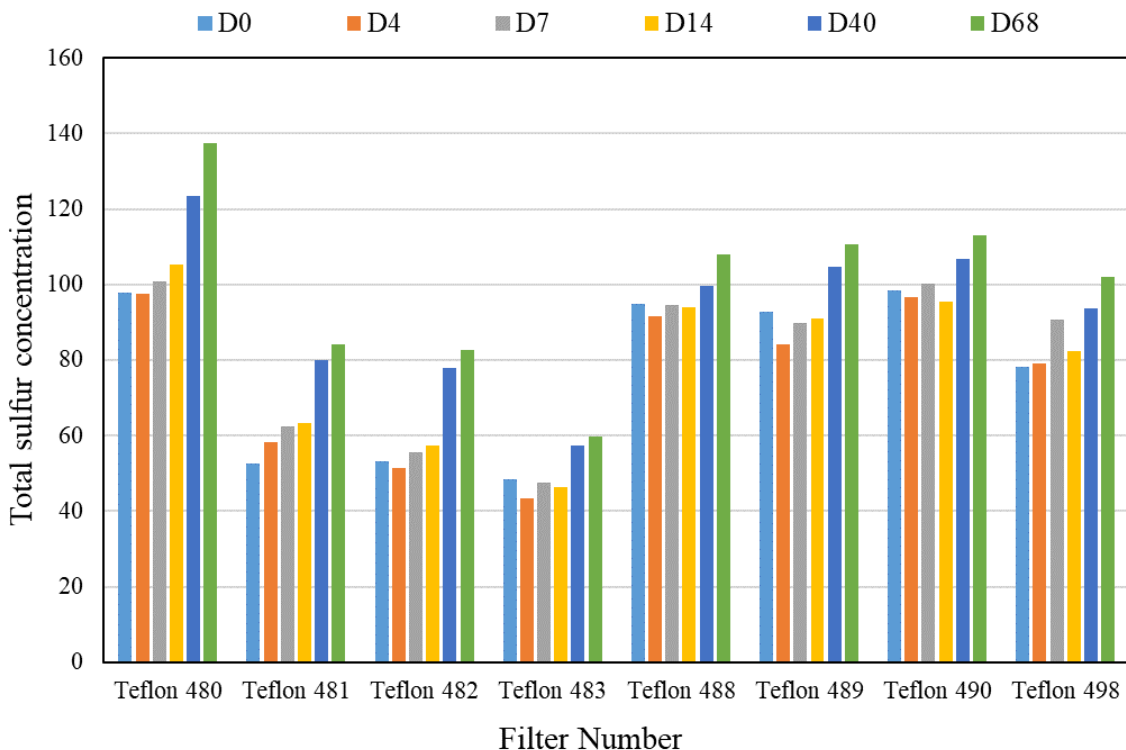

34  
35 Figure S5. Total sulfur concentrations via ICP-OES for eight 2-MTS filter samples analyzed six  
36 times over a two month period. D0 stands for day 0, D4 is the fourth day, etc.
